# Supplementary material for: Genome-wide survey of the seagrass Zostera muelleri suggests modification of the ethylene signalling network
Source: PubMed Central journal article supplement (PMC4339605; doi:10.1093/jxb/eru510), 2015-01-06
Supplement: supp_eru510_SupplementaryMaterial1_good2_updated.pdf [file supp_eru510_SupplementaryMaterial1_good2_updated.pdf]

## Supplementary Material

Genome-wide survey of the seagrass *Zostera muelleri* suggests modification of the ethylene signalling network

Authors: Agnieszka A Golicz, Martin Schliep, Huey Tyng Lee, Anthony WD Larkum, Rudy Dolferus, Jacqueline Batley, Chon-Kit Kenneth Chan, Gaurav Sablok, Peter J Ralph, David Edwards.

Coding sequence download ftp sites:

*A.thaliana*, *S. lycopersicum*, *O. sativa*, *S. polyrhiza* – Phytozome v10  
([phytozome.jgi.doe.gov](http://phytozome.jgi.doe.gov))

*P.dactylifera* - <http://qatar-weill.cornell.edu/research/datepalmGenome/download.html>

*M. acuminata* - <http://banana-genome.cirad.fr/content/download-dh-pahang>

*N. nucifera* - <https://genomevolution.org/CoGe/GenomeInfo.pl?gid=16884>

**Z. muelleri**

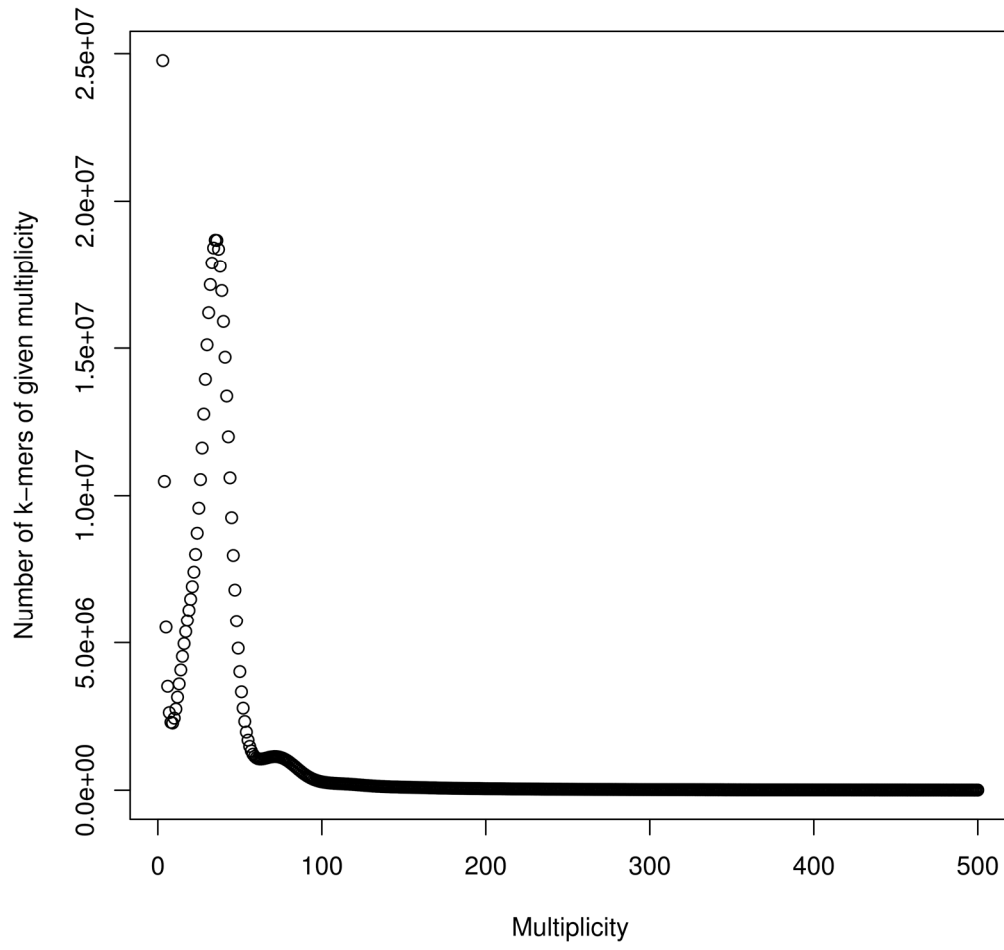

Fig S1. K-mer distribution for *Z. muelleri* genome. K-mers with multiplicity one and two were removed for image clarity.

### Z. marina

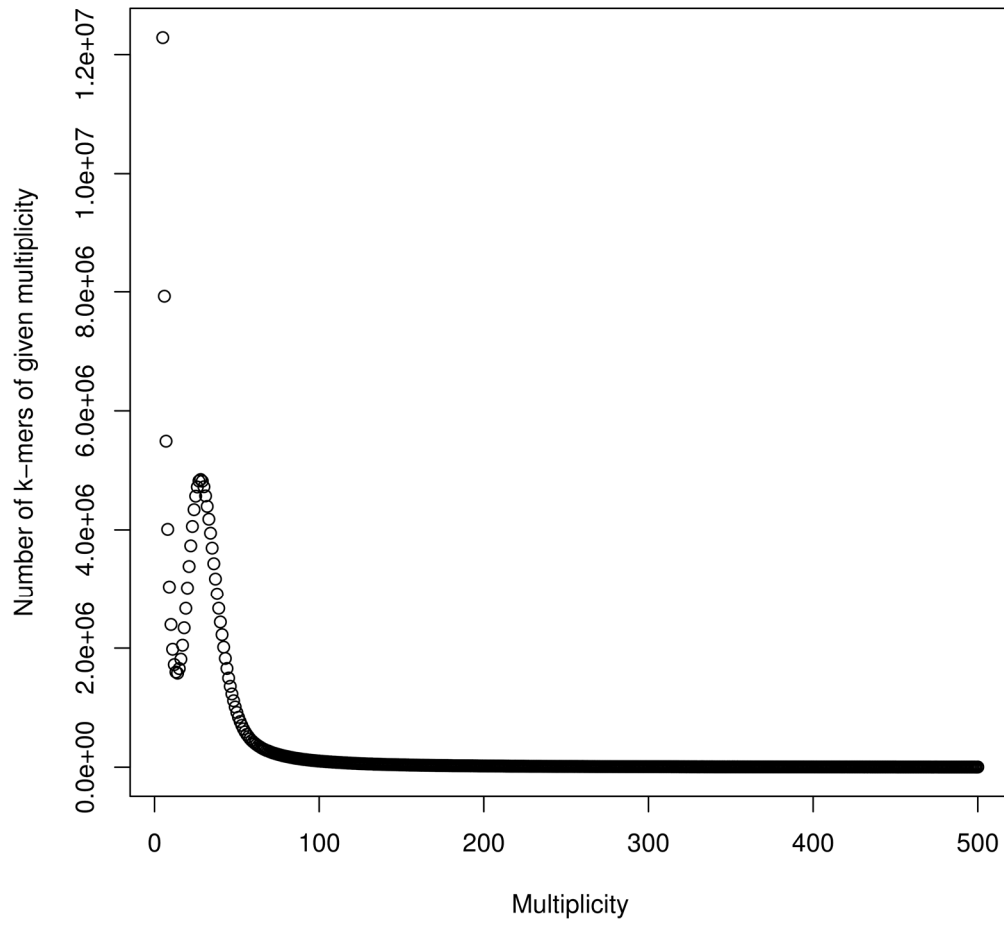

Fig S2. K-mer distribution for *Z. marina* genome. K-mers with multiplicity one to four were removed for image clarity.
